# Supplementary material for: Overview of Nucleocapsid-Targeting Vaccines against COVID-19
Source: MDPI journal article supplement (doi:10.3390/vaccines11121810), 2023-12-03
Supplement: s1 [file s1]

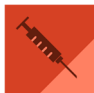

## Supplementary Materials

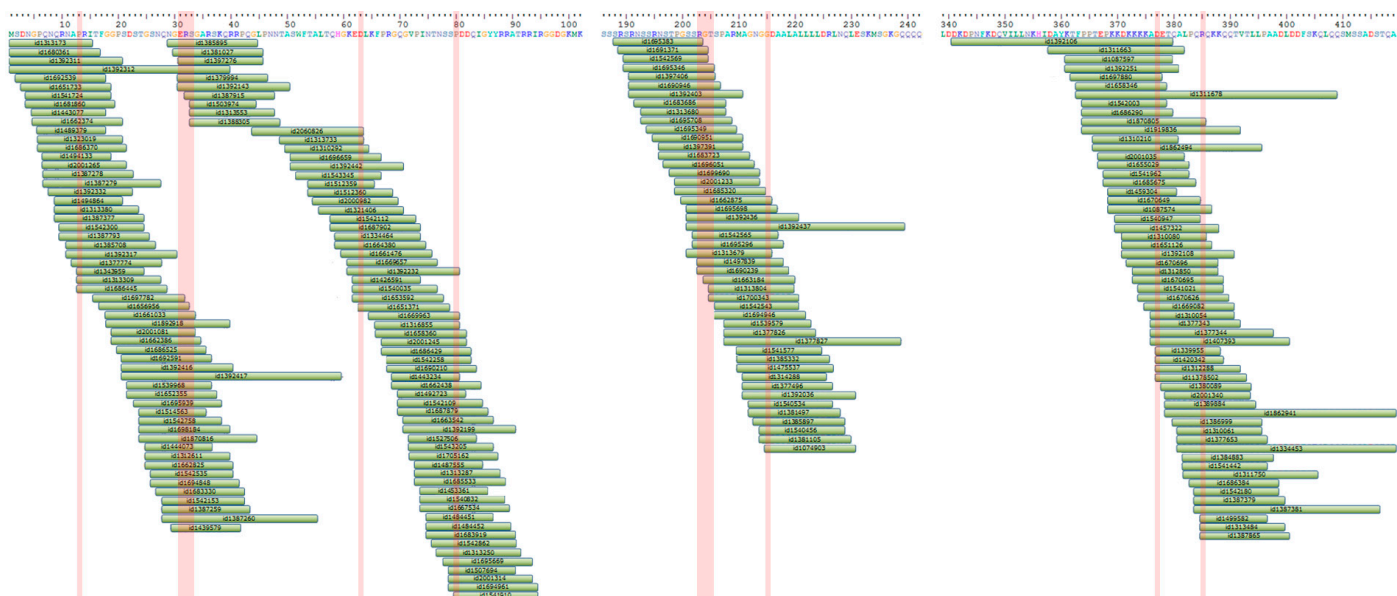

**Figure S1.** B-cell epitopes of SARS-CoV-2 N protein of B.1 (Wuhan) strain deposited in the Immune Epitope Database which contain variable amino acid residues. The alignment was visualized using the Geneious 10.2.5 Software.
